# Supplementary material for: Traceability of Biologics in The Netherlands: An Analysis of Information-Recording Systems in Clinical Practice and Spontaneous ADR Reports
Source: PubMed Central journal article supplement — Drug Saf. 2015 Dec 30;39:185–92. doi: 10.1007/s40264-015-0383-8 (PMC4735237; doi:10.1007/s40264-015-0383-8), 2015-12-30
Supplement: 40264_2015_383_MOESM2_ESM.pdf [file 40264_2015_383_MOESM2_ESM.pdf]

Supplement to: Klein K, Scholl JHG, Vermeer NS, Broekmans AW, Van Puijenbroek EP, De Bruin ML, Stolk P. Traceability of biologics in the Netherlands – an analysis of information-recording systems in clinical practice and spontaneous ADR reports. Drug Saf. 2015.

Utrecht Institute for Pharmaceutical Sciences (UIPS), Division of Pharmacoepidemiology and Clinical Pharmacology, Utrecht University, Universiteitsweg 99, 3584CG Utrecht, The Netherlands; Email: M.L.deBruin@uu.nl

### Electronic supplementary material 2: The sample list of recombinant biologics categorised in 11 product classes

| Product class      | Brand name                          | INN              | ATC code | Product type        | Expression system           |
|--------------------|-------------------------------------|------------------|----------|---------------------|-----------------------------|
| <b>Somatropins</b> | NutropinAq                          | somatropin       | H01AC01  | Recombinant protein | E. Coli                     |
|                    | Omnitrope <sup>ii</sup>             | somatropin       | H01AC01  | Recombinant protein | E. Coli                     |
|                    | Somatropin<br>Biopartners           | somatropin       | H01AC01  | Recombinant protein | Saccharomyces cerevisiae    |
|                    | Genotropin <sup>i</sup>             | somatropin       | H01AC01  | Recombinant protein | E. Coli                     |
|                    | Humatrope <sup>i</sup>              | somatropin       | H01AC01  | Recombinant protein | E. Coli                     |
|                    | Norditropin <sup>i</sup>            | somatropin       | H01AC01  | Recombinant protein | E. Coli                     |
|                    | Zomacton <sup>i</sup>               | somatropin       | H01AC01  | Recombinant protein | E. Coli                     |
| <b>Epoetins</b>    | Abseamed <sup>ii</sup>              | epoetin alfa     | B03XA01  | Recombinant protein | Chinese hamster ovary (CHO) |
|                    | Aranesp                             | darbepoetin alfa | B03XA02  | Recombinant protein | Chinese hamster ovary (CHO) |
|                    | Binocrit <sup>ii</sup>              | epoetin alfa     | B03XA01  | Recombinant protein | Chinese hamster ovary (CHO) |
|                    | Biopoin                             | epoetin theta    | B03XA01  | Recombinant protein | Chinese hamster ovary (CHO) |
|                    | Epoetin Alfa<br>Hexal <sup>ii</sup> | epoetin alfa     | B03XA01  | Recombinant protein | Chinese hamster ovary (CHO) |
|                    | Eporatio                            | epoetin theta    | B03XA01  | Recombinant protein | Chinese hamster ovary (CHO) |
|                    | Eporex <sup>i</sup>                 | epoetin alfa     | B03XA01  | Recombinant protein | Chinese hamster ovary (CHO) |

|                     |                                |                                          |         |                                 |                             |
|---------------------|--------------------------------|------------------------------------------|---------|---------------------------------|-----------------------------|
|                     | Mircera                        | methoxy polyethylene glycol-epoetin beta | B03XA03 | Recombinant protein             | Chinese hamster ovary (CHO) |
|                     | NeoRecormon                    | epoetin beta                             | B03XA01 | Recombinant protein             | Chinese hamster ovary (CHO) |
|                     | Retacrit <sup>ii</sup>         | epoetin zeta                             | B03XA01 | Recombinant protein             | Chinese hamster ovary (CHO) |
|                     | Silapo <sup>ii</sup>           | epoetin zeta                             | B03XA01 | Recombinant protein             | Chinese hamster ovary (CHO) |
| <b>Filgrastims</b>  | Accofil <sup>ii</sup>          | filgrastim                               | L03AA02 | Recombinant protein             | E. Coli                     |
|                     | Biograstim <sup>ii</sup>       | filgrastim                               | L03AA02 | Recombinant protein             | E. Coli                     |
|                     | Filgrastim Hexal <sup>ii</sup> | filgrastim                               | L03AA02 | Recombinant protein             | E. Coli                     |
|                     | Grastofil <sup>ii</sup>        | filgrastim                               | L03AA02 | Recombinant protein             | E. Coli                     |
|                     | Lonquex                        | lipegfilgrastim                          | L03AA14 | Recombinant protein             | E. Coli                     |
|                     | Neulasta                       | pegfilgrastim                            | L03AA13 | Recombinant protein             | E. Coli                     |
|                     | Neupogen <sup>i</sup>          | filgrastim                               | L03AA02 | Recombinant protein             | E. Coli                     |
|                     | Nivestim <sup>ii</sup>         | filgrastim                               | L03AA02 | Recombinant protein             | E. Coli                     |
|                     | Ratiograstim <sup>ii</sup>     | filgrastim                               | L03AA02 | Recombinant protein             | E. Coli                     |
|                     | Tevagrastim <sup>ii</sup>      | filgrastim                               | L03AA02 | Recombinant protein             | E. Coli                     |
|                     | Zarzio <sup>ii</sup>           | filgrastim                               | L03AA02 | Recombinant protein             | E. Coli                     |
| <b>Follitropins</b> | Bemfola <sup>ii</sup>          | follitropin alfa                         | G03GA05 | Recombinant protein             | Chinese hamster ovary (CHO) |
|                     | Elonva                         | corifollitropin alfa                     | G03GA09 | Recombinant protein             | Chinese hamster ovary (CHO) |
|                     | Fertavid                       | follitropin beta                         | G03GA06 | Recombinant protein             | Chinese hamster ovary (CHO) |
|                     | GONAL-f                        | follitropin alfa                         | G03GA05 | Recombinant protein             | Chinese hamster ovary (CHO) |
|                     | Ovaleap <sup>ii</sup>          | follitropin alfa                         | G03GA05 | Recombinant protein             | Chinese hamster ovary (CHO) |
|                     | Pergoveris                     | follitropin alfa /lutropin alfa          | G03GA05 | Recombinant protein             | Chinese hamster ovary (CHO) |
|                     | Puregon                        | follitropin beta                         | G03GA06 | Recombinant protein             | Chinese hamster ovary (CHO) |
| <b>Monoclonal</b>   | Adcetris                       | brentuximab vedotin                      | L01XC12 | Recombinant monoclonal antibody | Chinese hamster ovary (CHO) |

| <b>antibodies</b>      |                       |         |  | drug conjugate                                 |                                      |
|------------------------|-----------------------|---------|--|------------------------------------------------|--------------------------------------|
| Arzerra                | ofatumumab            | L01XC10 |  | Recombinant monoclonal antibody                | Murine cell line (NS0)               |
| Avastin                | bevacizumab           | L01XC07 |  | Recombinant monoclonal antibody                | Chinese hamster ovary (CHO)          |
| Benlysta               | belimumab             | L04AA26 |  | Recombinant monoclonal antibody                | Murine cell line (NS0)               |
| Cimzia                 | certolizumab pegol    | L04AB05 |  | Recombinant monoclonal antibody fragment       | E. Coli                              |
| Entyvio                | vedolizumab           | L04AA33 |  | Recombinant monoclonal antibody                | Chinese hamster ovary (CHO)          |
| Erbix                  | cetuximab             | L01XC06 |  | Recombinant monoclonal antibody                | Mammalian cell line (Sp2/0)          |
| Gazyvaro               | obinutuzumab          | L01XC15 |  | Recombinant monoclonal antibody                | Chinese hamster ovary (CHO)          |
| Herceptin              | trastuzumab           | L01XC03 |  | Recombinant monoclonal antibody                | Chinese hamster ovary (CHO)          |
| Humira                 | adalimumab            | L04AB04 |  | Recombinant monoclonal antibody                | Chinese hamster ovary (CHO)          |
| Ilaris                 | canakinumab           | L04AC08 |  | Recombinant monoclonal antibody                | Mammalian cell line (Sp2/0)          |
| Inflixtra <sup>®</sup> | infliximab            | L04AB02 |  | Recombinant monoclonal antibody                | Murine hybridoma cells               |
| Kadcyla                | trastuzumab emtansine | L01XC14 |  | Recombinant monoclonal antibody drug conjugate | Chinese hamster ovary (CHO)          |
| Lemtrada               | alemtuzumab           | L01XC04 |  | Recombinant monoclonal antibody                | Chinese hamster ovary (CHO)          |
| Lucentis               | ranibizumab           | S01LA04 |  | Recombinant monoclonal antibody fragment       | E. Coli                              |
| MabThera               | rituximab             | L01XC02 |  | Recombinant monoclonal antibody                | Chinese hamster ovary (CHO)          |
| Perjeta                | pertuzumab            | L01XC13 |  | Recombinant monoclonal antibody                | Chinese hamster ovary (CHO)          |
| Prolia                 | denosumab             | M05BX04 |  | Recombinant monoclonal antibody                | Chinese hamster ovary (CHO)          |
| Remicade               | infliximab            | L04AB02 |  | Recombinant monoclonal antibody                | Murine hybridoma cells               |
| Removab                | catumaxomab           | L01XC09 |  | Recombinant monoclonal antibody                | Rat-mouse hybrid-hybridoma cell line |
| Remsima <sup>®</sup>   | infliximab            | L04AB02 |  | Recombinant monoclonal antibody                | Murine hybridoma cells               |

|                 |                                 |                      |               |                                 |                             |
|-----------------|---------------------------------|----------------------|---------------|---------------------------------|-----------------------------|
|                 | RoActemra                       | tocilizumab          | L04AC07       | Recombinant monoclonal antibody | Chinese hamster ovary (CHO) |
|                 | Scintimun                       | besilesomab          | V09HA03       | Recombinant monoclonal antibody | Murine myeloma cell line    |
|                 | Simponi                         | golimumab            | L04AB06       | Recombinant monoclonal antibody | Mammalian cell line (Sp2/0) |
|                 | Simulect                        | basiliximab          | L04AC02       | Recombinant monoclonal antibody | Mouse myeloma cell line     |
|                 | Soliris                         | eculizumab           | L04AA25       | Recombinant monoclonal antibody | Murine cell line (NS0)      |
|                 | Stelara                         | ustekinumab          | L04AC05       | Recombinant monoclonal antibody | Mammalian cell line (Sp2/0) |
|                 | Sylvant                         | siltuximab           | L04AC11       | Recombinant monoclonal antibody | Chinese hamster ovary (CHO) |
|                 | Synagis                         | palivizumab          | J06BB16       | Recombinant monoclonal antibody | Murine cell line (NS0)      |
|                 | Tysabri                         | natalizumab          | L04AA23       | Recombinant monoclonal antibody | Murine cell line (NS0)      |
|                 | Vectibix                        | panitumumab          | L01XC08       | Recombinant monoclonal antibody | Chinese hamster ovary (CHO) |
|                 | Xgeva                           | denosumab            | M05BX04       | Recombinant monoclonal antibody | Chinese hamster ovary (CHO) |
|                 | Xolair                          | omalizumab           | R03DX05       | Recombinant monoclonal antibody | Chinese hamster ovary (CHO) |
|                 | Yervoy                          | ipilimumab           | L01XC11       | Recombinant monoclonal antibody | Chinese hamster ovary (CHO) |
|                 | Zevalin                         | ibritumomab tiuxetan | V10XX02       | Recombinant monoclonal antibody | Chinese hamster ovary (CHO) |
| <b>Insulins</b> | Abasaglar/Abasria <sup>II</sup> | insulin glargine     | A10AE04       | Recombinant protein             | E. Coli                     |
|                 | Actraphane                      | insulin human        | A10AD01       | Recombinant protein             | Saccharomyces cerevisiae    |
|                 | Actrapid                        | human insulin        | A10AB01       | Recombinant protein             | Saccharomyces cerevisiae    |
|                 | Apidra                          | insulin glulisine    | A10AB06       | Recombinant protein             | E. Coli                     |
|                 | Humalog                         | insulin lispro       | A10AB/AC/AD04 | Recombinant protein             | E. Coli                     |
|                 | Humulin <sup>I</sup>            | insulin human        | A10AB/AC01    | Recombinant protein             | E. Coli                     |
|                 | Insulatard                      | insulin human        | A10AC01       | Recombinant protein             | Saccharomyces cerevisiae    |
|                 | Insulin Human<br>Winthrop       | insulin human        | A10AB/CD01    | Recombinant protein             | E. Coli                     |
|                 | Insuman                         | insulin human        | A10AB/CD01    | Recombinant protein             | E. Coli                     |
|                 | Lantus                          | insulin glargine     | A10AE04       | Recombinant protein             | E. Coli                     |

|                                |                 |                                   |         |                     |                             |
|--------------------------------|-----------------|-----------------------------------|---------|---------------------|-----------------------------|
|                                | Levemir         | insulin detemir                   | A10AE05 | Recombinant protein | Saccharomyces cerevisiae    |
|                                | Liprolog        | insulin lispro                    | A10AC04 | Recombinant protein | E. Coli                     |
|                                | Mixtard         | insulin human                     | A10AD01 | Recombinant protein | Saccharomyces cerevisiae    |
|                                | NovoMix         | insulin aspart                    | A10AD05 | Recombinant protein | Saccharomyces cerevisiae    |
|                                | NovoRapid       | insulin aspart                    | A10AB05 | Recombinant protein | Saccharomyces cerevisiae    |
|                                | Optisulin       | insulin glargine                  | A10AE04 | Recombinant protein | E. Coli                     |
|                                | Protaphane      | insulin human                     | A10AC01 | Recombinant protein | Saccharomyces cerevisiae    |
|                                | Ryzodeg         | insulin degludec / insulin aspart | A10AD06 | Recombinant protein | Saccharomyces cerevisiae    |
|                                | Tresiba         | insulin degludec                  | A10AE06 | Recombinant protein | Saccharomyces cerevisiae    |
| <b>Interferons</b>             | Avonex          | interferon beta-1a                | L03AB07 | Recombinant protein | Chinese hamster ovary (CHO) |
|                                | Betaferon       | interferon beta-1b                | L03AB08 | Recombinant protein | E. Coli                     |
|                                | Extavia         | interferon beta-1b                | L03AB08 | Recombinant protein | E. Coli                     |
|                                | IntronA         | interferon alfa-2b                | L03AB05 | Recombinant protein | E. Coli                     |
|                                | Pegasys         | peginterferon alfa-2a             | L03AB11 | Recombinant protein | E. Coli                     |
|                                | PegIntron       | peginterferon alfa-2b             | L03AB10 | Recombinant protein | E. Coli                     |
|                                | Plegridy        | peginterferon beta-1a             | L03AB13 | Recombinant protein | Chinese hamster ovary (CHO) |
|                                | Rebif           | interferon beta-1a                | L03AB07 | Recombinant protein | Chinese hamster ovary (CHO) |
|                                | ViraferonPeg    | peginterferon alfa-2b             | L03AB10 | Recombinant protein | E. Coli                     |
| <b>Antihaemophilic factors</b> | NovoSeven       | eptacog alfa (activated)          | B02BD08 | Recombinant protein | Baby hamster kidney (BHK)   |
|                                | Advate          | octocog alfa                      | B02BD02 | Recombinant protein | Chinese hamster ovary (CHO) |
|                                | Helixate NexGen | octocog alfa                      | B02BD02 | Recombinant protein | Baby hamster kidney (BHK)   |
|                                | Kogenate Bayer  | octocog alfa                      | B02BD02 | Recombinant protein | Baby hamster kidney (BHK)   |
|                                | NovoEight       | turoctocog alfa                   | B02BD02 | Recombinant protein | Baby hamster kidney (BHK)   |
|                                | ReFacto AF      | moroctocog alfa                   | B02BD02 | Recombinant protein | Chinese hamster ovary (CHO) |

|                        |                       |                    |         |                                     |                             |
|------------------------|-----------------------|--------------------|---------|-------------------------------------|-----------------------------|
|                        | BeneFIX               | nonacog alfa       | B02BD09 | Recombinant protein                 | Chinese hamster ovary (CHO) |
|                        | NovoThirteen          | catridecacog       | B02BD11 | Recombinant protein                 | Saccharomyces cerevisiae    |
| <b>Fusion proteins</b> | Enbrel                | etanercept         | L04AB01 | Recombinant fusion protein          | Chinese hamster ovary (CHO) |
|                        | Eylea                 | aflibercept        | S01LA05 | Recombinant fusion protein          | Chinese hamster ovary (CHO) |
|                        | Nulojix               | belatacept         | L04AA28 | Recombinant fusion protein          | Chinese hamster ovary (CHO) |
|                        | Orencia               | abatacept          | L04AA24 | Recombinant fusion protein          | Chinese hamster ovary (CHO) |
|                        | Zaltrap               | aflibercept        | L01XX44 | Recombinant fusion protein          | Chinese hamster ovary (CHO) |
|                        |                       |                    |         |                                     |                             |
| <b>Enzymes</b>         | Aldurazyme            | laronidase         | A16AB05 | Recombinant protein                 | Chinese hamster ovary (CHO) |
|                        | Cerezyme              | imiglucerase       | A16AB02 | Recombinant protein                 | Chinese hamster ovary (CHO) |
|                        | Elaprase              | idursulfase        | A16AB09 | Recombinant protein                 | Human cell line (HT-1080)   |
|                        | Fabrazyme             | agalsidase beta    | A16AB04 | Recombinant protein                 | Chinese hamster ovary (CHO) |
|                        | Fasturtec             | rasburicase        | V03AF07 | Recombinant protein                 | Saccharomyces cerevisiae    |
|                        | Krystexxa             | pegloticase        | M04AX02 | Recombinant protein                 | E. Coli                     |
|                        | Metalyse              | tenecteplase       | B01AD11 | Recombinant protein                 | Chinese hamster ovary (CHO) |
|                        | Myozyme               | alglucosidase alfa | A16AB07 | Recombinant protein                 | Chinese hamster ovary (CHO) |
|                        | Naglazyme             | galsulfase         | A16AB08 | Recombinant protein                 | Chinese hamster ovary (CHO) |
|                        | Rapilysin             | reteplase          | B01AD07 | Recombinant protein                 | E. Coli                     |
|                        | Replagal              | agalsidase alfa    | A16AB03 | Recombinant protein                 | Human cell line (HT-1080)   |
|                        | Vimizim               | elosulfase alfa    | A16AB12 | Recombinant protein                 | Chinese hamster ovary (CHO) |
|                        | Vpriv                 | velaglucerase alfa | A16AB10 | Recombinant, gene-activated protein | Human cell line (HT-1080)   |
|                        |                       |                    |         |                                     |                             |
| <b>Other</b>           | Revasc <sup>iii</sup> | desirudin          | B01AE01 | Recombinant protein                 | Saccharomyces cerevisiae    |
|                        | Beromun               | tasonermin         | L03AX11 | Recombinant protein                 | E. Coli                     |
|                        | Increlex              | mecasermin         | H01AC03 | Recombinant protein                 | E. Coli                     |
|                        | Forsteo               | teriparatide       | H05AA02 | Recombinant peptide                 | E. Coli                     |

|  |                         |                                |                 |                            |                             |
|--|-------------------------|--------------------------------|-----------------|----------------------------|-----------------------------|
|  | Jetrea                  | ocriplasmin                    | S01XA22         | Recombinant protein        | Pichia pastoris             |
|  | Kepivance               | palifermin                     | V03AF08         | Recombinant protein        | E. Coli                     |
|  | Thyrogen                | thyrotropin alfa               | H01AB01/V04CJ01 | Recombinant protein        | Chinese hamster ovary (CHO) |
|  | Luveris                 | lutropin alfa                  | G03GA07         | Recombinant protein        | Chinese hamster ovary (CHO) |
|  | Ovitrelle               | choriogonadotropin alfa        | G03GA08         | Recombinant protein        | Chinese hamster ovary (CHO) |
|  | Osigraft                | eptotermin alfa                | M05BC02         | Recombinant protein        | Chinese hamster ovary (CHO) |
|  | Opgenra                 | eptotermin alfa                | M05BC02         | Recombinant protein        | Chinese hamster ovary (CHO) |
|  | Inductos                | dibotermin alfa                | M05BC01         | Recombinant protein        | Chinese hamster ovary (CHO) |
|  | Somavert                | pegvisomant                    | H01AX01         | Recombinant protein        | E. Coli                     |
|  | Preotact <sup>iii</sup> | parathyroid hormone<br>(rDNA)  | H05AA03         | Recombinant protein        | E. Coli                     |
|  | ATryn                   | antithrombin alfa              | B01AB02         | Recombinant protein        | Transgenic goat             |
|  | Victoza                 | liraglutide                    | A10BX07         | Recombinant protein        | Saccharomyces cerevisiae    |
|  | Ruconest                | conestat alfa                  | B06AC04         | Recombinant protein        | Transgenic rabbit           |
|  | Revestive               | teduglutide                    | A16AX08         | Recombinant peptide        | E. Coli                     |
|  | Kineret                 | anakinra                       | L04AC03         | Recombinant protein        | E. Coli                     |
|  | Nplate                  | romiplostim                    | B02BX04         | Recombinant fusion protein | E. Coli                     |
|  | HyQvia                  | human normal<br>immunoglobulin | J06BA           | Recombinant protein        | Chinese hamster ovary (CHO) |

<sup>i</sup> Recombinant biologic that is approved prior to 1995

<sup>ii</sup> Biosimilar

<sup>iii</sup> Marketing authorisation has been withdrawn during the conduct of this study
