# Supplementary material for: Traceability of Biologics in The Netherlands: An Analysis of Information-Recording Systems in Clinical Practice and Spontaneous ADR Reports
Source: Springer Nature journal article supplement (doi:10.1007/s40264-015-0383-8), 2015-12-30
Supplement: MOESM1 [file 24117504]

**Electronic supplementary material 1: Online questionnaire - Netherlands Association of Hospital Pharmacies**

Supplement to: Klein K, Scholl JHG, Vermeer NS, Broekmans AW, Van Puijenbroek EP, De Bruin ML, Stolk P. Traceability of biologics in the Netherlands – an analysis of information-recording systems in clinical practice and spontaneous ADR reports. *Drug Saf.* 2015.

*Utrecht Institute for Pharmaceutical Sciences (UIPS), Division of Pharmacoepidemiology and Clinical Pharmacology, Utrecht University, Universiteitsweg 99, 3584CG Utrecht, The Netherlands; Email: M.L.deBruin@uu.nl*

## Introductie

Uw ziekenhuisapotheek wordt uitgenodigd om deel te nemen aan een enquête van het Escher Project: 'Pharmacovigilance of biologics: Addressing the challenges of product and batch traceability in ADR reporting'. Dit project wordt ondersteund door de NVZA en de KNMP (meer over dit project [hier](#)).

Het project heeft ten doel om inzicht te krijgen in de informatie die in het zorgproces aanwezig is met betrekking tot de identiteit van geneesmiddelen. Bijzondere interesse gaat hierbij uit naar de traceerbaarheid van biologische producten (waaronder merknaam en chargenummer), bijvoorbeeld in het geval van het melden van bijwerkingen. Voor deze enquête wordt onder biologische producten ('biologics') recombinante, biotechnologische geneesmiddelen verstaan. Hiervoor laten wij vaccins en bloedproducten buiten beschouwing.

In de enquête vragen wij om een overzicht te geven van de processen en (IT-) systemen voor het opslaan van geneesmiddeleninformatie in het distributieproces binnen uw ziekenhuis: van de levering van geneesmiddelen aan het ziekenhuis tot aan, en na, de toediening aan de patiënt.

De resultaten van dit onderzoek worden gebruikt om de praktijk voor het opslaan en delen van geneesmiddeleninformatie in kaart te brengen voor Nederlandse ziekenhuizen. Alle resultaten worden door TI Pharma / Escher vertrouwelijk behandeld. De resultaten worden gerapporteerd op een niveau van aggregatie dat niet de traceerbaarheid naar individuele ziekenhuizen toestaat.

Wij denken dat u voor het invullen van deze enquête ongeveer 20 minuten nodig is. Bovenaan op de pagina kunt u de voortgangsbalk zien.

### Structuur van de enquête

De enquête bestaat uit vier onderdelen:

- Deel 1 : Contactgegevens
- Deel 2 : IT systemen en processen rond het opslaan van geneesmiddeleninformatie
- Deel 3 : Ervaringen met het melden van bijwerkingen
- Deel 4 : Opinie over verbetering van het huidige systeem

### Uiterste inzenddatum

Het uiterste inzenddatum voor deze enquête is dinsdag 17 februari.

Als u vragen of opmerkingen hebt over deze enquête of het project kunt u contact met ons opnemen via:

# Traceerbaarheid van geneesmiddelen in het ziekenhuis

## Deel 1: Contactgegevens

De onderstaande informatie is enkel noodzakelijk voor een eventuele terugkoppeling van de resultaten en/of mogelijke aanvullende vragen.

**\* 1a. Naam respondent:**

**\* 1b. Naam van het ziekenhuis:**

**1c. Functie binnen de ziekenhuisapotheek:**

**1d. Contactgegevens van de respondent:**

Email:

Telefoon:

## Deel 2: (IT-) systemen en processen rond het opslaan van geneesmiddelinform...

In deel 2 ligt de focus op waar informatie over een geneesmiddel wordt opgeslagen en in hoeverre deze informatie aan een patiënt is gekoppeld. De onderstaande afbeelding geeft de algemene processen weer binnen de intramurale zorg, bestaande uit drie onderdelen:

**Blauw:** Het geneesmiddeldistributieproces - vanaf de fabrikant/groothandel tot aan de deur van de ziekenhuisapotheek

**Groen:** Het intramurale zorgproces - vanaf het stellen van de diagnose tot aan het toedienen aan de patiënt.

**Rood:** Het informatieopslagproces – het registreren van informatie in het elektronisch voorschrijfsysteem (EVS), bereidingsprotocol, ziekenhuisapotheek informatiesysteem (ZAIS), toedieningsregistratiesysteem (TRS), elektronisch patiëntendossier (EPD) en/of andere informatiesystemen

We beginnen met vragen over welke informatie over een geneesmiddel in het EPD wordt opgeslagen, waarin ook het EVS betrokken wordt. Vervolgens hebben wij een aantal vragen over welke informatie wordt opgeslagen tijdens de verschillende stappen die het geneesmiddel doorloopt:

- Bereiden of voor toediening gereed maken (VTGM)
- Verstrekken
- Toedienen

Bij iedere stap heeft u ruimte om aanvullende informatie te geven in een vrij tekstveld.

# Traceerbaarheid van geneesmiddelen in het ziekenhuis

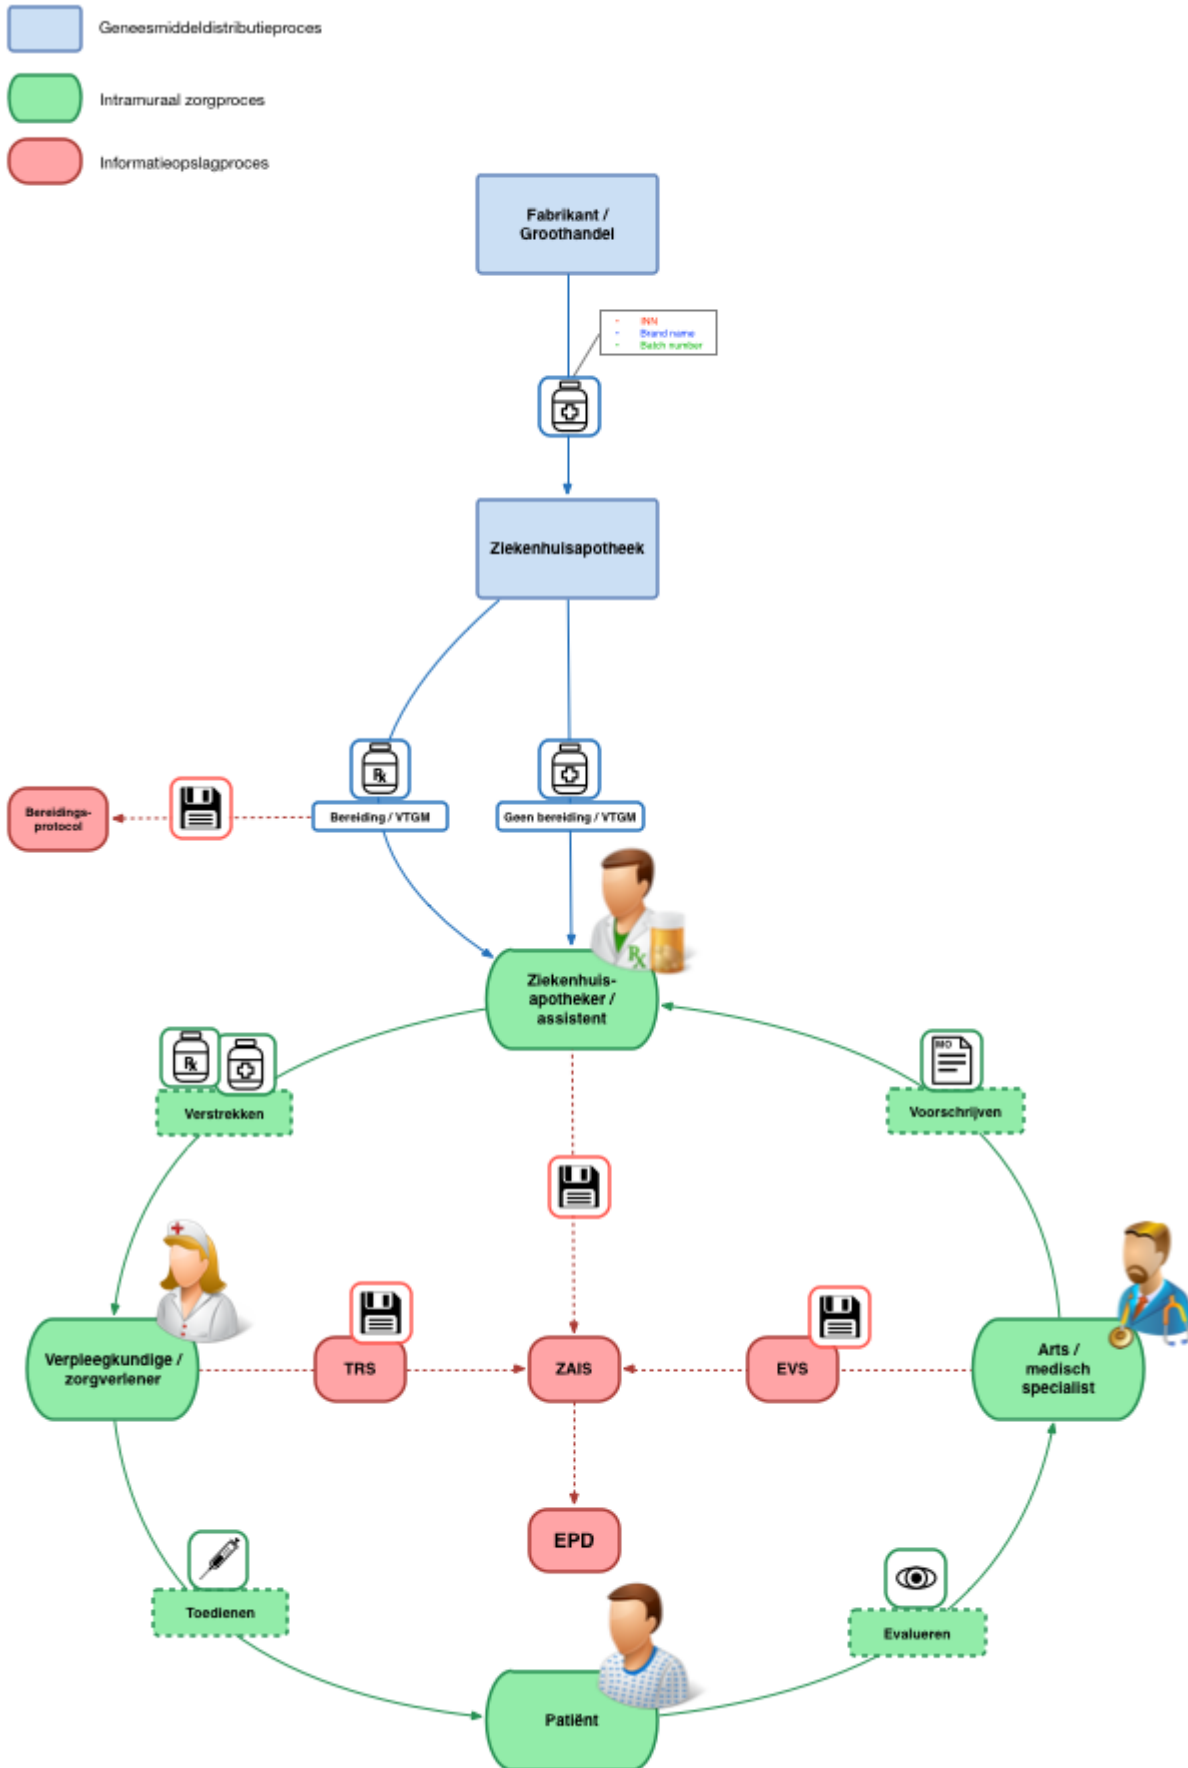

## Deel 2: Elektronisch patiëntendossier (EPD)

Welke informatie over het geneesmiddel dat is toegediend aan de patiënt, wordt in het EPD van uw ziekenhuis opgeslagen?

### \* 2a. Welk elektronisch patiëntendossier (EPD) wordt in uw ziekenhuis gebruikt?

(Meerdere antwoorden mogelijk)

- Alert
- CSC-iSoft
- Epic
- HiX (ChipSoft)
- McKesson
- Mirador (iSoft)
- SAP
- Soarian (Siemens)
- Ander EPD:

### \* 2b. Welk elektronisch voorschrijfsysteem (EVS) wordt in uw ziekenhuis gebruikt?

(Meerdere antwoorden mogelijk)

- Centrasys EVS (iSoft)
- Chipsoft
- Epic
- Farmed Rx
- Klinikom (Pharmapartners)
- Medicator (iSoft)
- Pharma Systeem (Ross Health)
- Therapy
- Theriak TMM
- ViPharma (VCD Healthcare)
- Wij maken geen gebruik van een EVS binnen ons ziekenhuis
- Ander EVS:

## Traceerbaarheid van geneesmiddelen in het ziekenhuis

**\*2c. Wordt de 'brand name' (merknaam), dus niet alleen de generieke stofnaam (INN), van het aan een patiënt toegediende geneesmiddel opgeslagen in het EVS/EPD?**

- Nooit       Soms       Meestal       Altijd

Geef nadere toelichting (bijvoorbeeld in welke gevallen wordt het wel of niet opgeslagen?):

**\*2d. Wordt het chargennummer van het aan een patiënt toegediende geneesmiddel opgeslagen in het EVS/EPD?**

- Nooit       Soms       Meestal       Altijd

Geef nadere toelichting (bijvoorbeeld in welke gevallen wordt het chargennummer wel of niet opgeslagen?):

**\*2e. Wie heeft directe toegang tot de geneesmiddelinformatie in het EVS/EPD? (Meerdere antwoorden mogelijk)**

- Arts / medisch specialist  
 Ziekenhuisapotheker  
 Apothekersassistent  
 Verpleegkundige  
 Overige zorgverleners van het ziekenhuis  
 Overig:

## Deel 2: Elektronisch patiëntendossier (EPD)

**2f. Mochten de vragen over het EPD niet aansluiten op de situatie in uw ziekenhuis, of mocht u aanvullende informatie willen geven, dan kunt u onderstaand tekstvak gebruiken.**





## Deel 2: Bereiden of voor toediening gereed maken (VTGM)

Deze vraag gaat over de bereidingsstap (incl. VTGM) in de ziekenhuisapothek. Tijdens deze stap kan informatie worden opgeslagen, bijvoorbeeld in een digitaal of papieren bereidingsprotocol. Hieronder treft u enkele vragen aan over welke informatie tijdens deze stap wordt geregistreerd.

### \*2g. Welke informatie over het geneesmiddel wordt tijdens de bereiding/VTGM in de ziekenhuisapothek in het bereidingsprotocol opgeslagen? (Meerdere antwoorden mogelijk)

- INN (stofnaam)
- 'Brand name' (merknaam)
- Chargenummer
- Geen

### \*2h. Vindt informatieoverdracht van het bereidingsprotocol naar een ander informatiesysteem plaats? (Meerdere antwoorden mogelijk)

- Ja, het digitale bereidingsprotocol is gekoppeld aan het EPD
- Ja, het digitale bereidingsprotocol is gekoppeld aan het ZAIS
- Ja, de informatie in het papieren bereidingsprotocol wordt ook opgeslagen in het EPD
- Ja, de informatie in het papieren bereidingsprotocol wordt ook opgeslagen in het ZAIS
- Nee, er vindt geen informatieoverdracht plaats
- Anders:

### \*2i. Wie heeft directe toegang tot de informatie in het bereidingsprotocol? (Meerdere antwoorden mogelijk)

- Arts / medisch specialist
- Ziekenhuisapotheker
- Apothekersassistent
- Verpleegkundige
- Overige zorgverleners van het ziekenhuis
- Overig:

## Deel 2: Bereiden of voor toediening gereed maken (VTGM)

**Mochten de vragen over de bereiding/VTGM niet aansluiten op de situatie in uw ziekenhuis, of mocht u aanvullende informatie willen geven, dan kunt u onderstaand tekstvak gebruiken.**



## Deel 2: Verstrekken

Deze vraag gaat over het afleveren van het geneesmiddel aan de verpleegafdeling. Tijdens het afleveren van het geneesmiddel kan informatie worden opgeslagen, bijvoorbeeld in het ziekenhuisapothek informatiesysteem (ZAIS). Eventueel kan deze informatie gekoppeld zijn aan andere systemen. Hieronder treft u enkele vragen aan over welke informatie tijdens deze stap wordt geregistreerd.

### \* 2j. Welk ziekenhuisapothek informatiesysteem (ZAIS) wordt binnen uw ziekenhuis gebruikt?

- Apoth-medi (iSoft)
- Centrasys (iSoft)
- Chipsoft
- Pharma Systeem (Ross Health)
- Theriak
- ViPharma (VCD Healthcare)
- Zamicom (Pharmapartners)
- Ander systeem:

### \* 2k. Welke informatie over het geneesmiddel wordt tijdens het verstrekken/afleveren opgeslagen in het ZAIS? (Meerdere antwoorden mogelijk)

- INN (stofnaam)
- Brand name (merknaam)
- Chargenummer

### \* 2l. Wie heeft directe toegang tot de informatie over het verstrekte geneesmiddel in het ZAIS? (Meerdere antwoorden mogelijk)

- Arts / medisch specialist
- Ziekenhuisapotheker
- Apothekersassistent
- Verpleegkundige
- Overige zorgverleners van het ziekenhuis
- Overig:

## Traceerbaarheid van geneesmiddelen in het ziekenhuis

### \*2m. Vindt een informatieoverdracht van de informatie opgeslagen in het ZAIS naar het EPD plaats?

- Ja, de informatie van het verstrekte geneesmiddel wordt automatisch opgeslagen in het EPD (door middel van koppeling ZAIS met EPD)
- Ja, de informatie van het verstrekte geneesmiddel wordt handmatig in het EPD opgeslagen
- Nee, er vindt geen informatieoverdracht naar het EPD plaats.
- Anders:

## Deel 2: Verstrekken

**Mochten de vragen over het verstrekken van geneesmiddelen niet aansluiten op de situatie in uw ziekenhuis, of mocht u aanvullende informatie willen geven, dan kunt u onderstaand tekstvak gebruiken.**

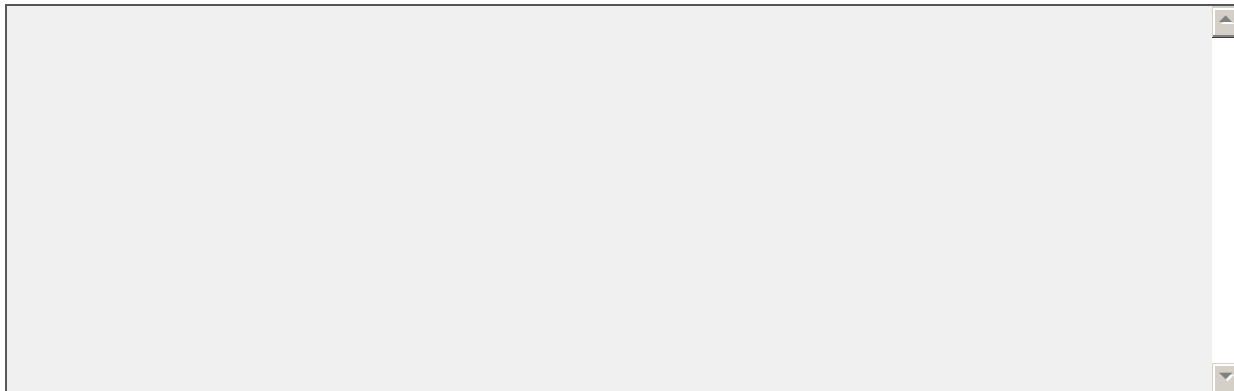

## Deel 2: Toedienen

Deze vraag gaat over het toedienen van het geneesmiddel aan de patiënt. Tijdens deze stap kan informatie worden opgeslagen in een toedieningsregistratiesysteem (TRS). Hieronder treft u enkele vragen aan over welke informatie tijdens deze stap wordt geregistreerd.

### **\*2n. Maakt uw ziekenhuis gebruik van een digitaal toedieningsregistratiesysteem (TRS)?**

Ja

Nee

## Deel 2: Toedienen

### \*2o. Welk TRS gebruikt uw ziekenhuis?

- Centrasys TRS (iSoft)
- Klinikom (Pharmapartners)
- Pharma Systeem (Ross Health)
- Therapy
- ViPharma (VCD Healthcare)
- Ander systeem:

### \*2p. Welke informatie over het geneesmiddel wordt tijdens de toediening opgeslagen?

(Meerdere antwoorden mogelijk)

- INN (stofnaam)
- Brand name (merknaam)
- Chargenummer

### \*2q. Hoe wordt deze informatie opgeslagen?

- Electronisch met barcode scan
- Electronisch handmatig en barcode scan
- Electronisch handmatig (geen barcode scan)
- Anders:

## Traceerbaarheid van geneesmiddelen in het ziekenhuis

### \*2r. Wie heeft directe toegang tot de informatie over het toegediende geneesmiddel in het TRS? (Meerdere antwoorden mogelijk)

- Arts / medisch specialist
- Ziekenhuisapotheker
- Apothekersassistent
- Verpleegkundige
- Overige zorgverleners van het ziekenhuis
- Overig:

### \*2s. Vindt een informatieoverdracht van het TRS naar een ander informatiesysteem plaats?

- Ja, automatische informatieoverdracht naar het EPD (TRS onderdeel van het EPD)
- Ja, automatische informatieoverdracht naar het ZAIS (TRS onderdeel van het ZAIS)
- Ja, automatische informatieoverdracht naar het EPD (TRS gekoppeld aan het EPD)
- Ja, automatische informatieoverdracht naar het ZAIS (TRS gekoppeld aan het ZAIS)
- Ja, handmatige informatieoverdracht naar EPD
- Ja, handmatige informatieoverdracht naar ZAIS
- Nee, er vindt geen informatieoverdracht plaats
- Anders:



## Deel 2: Toedienen

**\* 2t. Wordt tijdens de toediening van een geneesmiddel de merknaam en/of het chargennummer opgeslagen?**

- Nee, merknaam en chargennummer worden niet opgeslagen
- Ja, alleen de merknaam wordt opgeslagen
- Ja, alleen het chargennummer wordt opgeslagen
- Ja, merknaam en chargennummer worden opgeslagen

Anders:

## Deel 2: Toedienen

**\* 2u. Waar wordt deze informatie in opgeslagen? (Meerdere antwoorden mogelijk)**

EPD

ZAIS

Anders (licht nader toe voor wie de informatie beschikbaar is):

## Deel 2: Toedienen

**Mochten de vragen over de toediening van geneesmiddelen niet aansluiten op de situatie in uw ziekenhuis, of mocht u aanvullende informatie willen geven, dan kunt u onderstaand tekstvak gebruiken.**



## Deel 2: Andere (IT-) systemen en/of maatregelen

**Zijn er in uw ziekenhuis speciale maatregelen om de traceerbaarheid van biologics te waarborgen? Bijvoorbeeld een specifiek ICT-systeem of een andere methode om de traceerbaarheid van aan patiënten toegediende geneesmiddelen te waarborgen?**

**Zo ja, beschrijf deze in onderstaand tekstvak:**

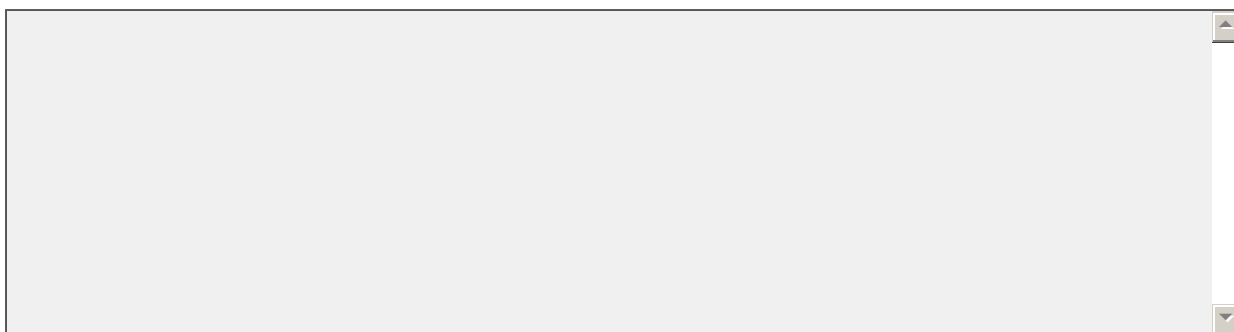

## Deel 3: Melden van bijwerkingen binnen uw ziekenhuis

In deel 3 van de survey vragen wij naar uw ervaringen met het melden van bijwerkingen.

### 3a. Indien u een bijwerking meldt, wat bepaalt dat u de bijwerking meldt bij het Lareb en wat bepaalt dat u de bijwerking meldt bij de fabrikant?

*Uit recente literatuur is bekend dat de 'brand name' (merknaam) bij meldingen van bijwerkingen niet altijd wordt gemeld.*

### 3b. Wat zijn volgens u de belangrijkste redenen voor het vermelden van enkel de INN (stofnaam) en niet de 'brand name' (merknaam) bij het melden van een bijwerking?

(Meerdere antwoorden mogelijk)

- Ik heb geen toegang tot de informatie over de merknaam
- Het is mij niet bekend dat de merknaam gemeld moet worden
- Het kost te veel tijd/moeite om de merknaam te achterhalen
- Het nut van het melden van de merknaam is mij onduidelijk
- De merknaam wordt niet opgeslagen binnen ons ziekenhuis en is daarom niet beschikbaar
- N.v.t.: Bij ons wordt altijd de merknaam vermeld op de melding van een bijwerking
- Andere reden(en):

## Traceerbaarheid van geneesmiddelen in het ziekenhuis

*Uit recente literatuur is bekend dat het chargennummer vaak ontbreekt als er een melding van een bijwerking van een biologic wordt gedaan.*

### 3c. Wat zijn volgens u de belangrijkste redenen voor het ontbreken van het chargennummer bij het melden van een bijwerking van een biologic? (Meerdere antwoorden mogelijk)

- Ik heb geen toegang tot de informatie over het chargennummer
- Het nut van het melden van het chargennummer is mij onduidelijk
- Het is mij niet bekend dat het chargennummer gemeld moet worden
- Het chargennummer wordt niet opgeslagen binnen ons ziekenhuis en is daarom niet beschikbaar
- Het kost te veel tijd/moeite om het chargennummer te achterhalen
- N.v.t.: Bij ons wordt altijd het chargennummer vermeld op de melding van een bijwerking van een 'biologic'
- Andere reden(en):

### 3d. Welke extra handelingen verricht u om het chargennummer te achterhalen in het geval dat dit niet bekend is maar u dit toch wilt melden?

- De oorspronkelijke geneesmiddelverpakking proberen te achterhalen
- Chargennummer achterhalen bij de groothandel
- Chargennummer achterhalen bij de fabrikant
- Ik verricht geen extra handeling om het chargennummer te achterhalen
- Anders (geef nadere toelichting):

### Mocht u nog aanvullende informatie of opmerkingen over deel 3 (het melden van bijwerkingen) hebben, dan kunt u onderstaand tekstvak gebruiken:

## Deel 4: Opinie over verbetering van het huidige systeem

In deze laatste vraag willen wij uw mening weten over knelpunten en mogelijke verbeteringen om de traceerbaarheid van geneesmiddelen te optimaliseren. Hiervoor kunt u van onderstaande tekstvakken gebruik maken.

### Knelpunten van het huidige systeem:

### Mogelijke oplossingen:
